# Supplementary material
Source: Elsevier journal article supplement (https://www.sciencedirect.com/science/article/pii/S0121812321001092)
Supplement: mmc1 [file S0121812321001092:mmc1.doc]

| Anexo 1– Comparación del desempeño como prueba de tamizaje del cuestionario Copcord para la detección de enfermedades reumáticas en diferentes estudios de Latinoamérica | | | | | | | | | | | | | | | | | | | | | | | | | | | | |
| --- | --- | --- | --- | --- | --- | --- | --- | --- | --- | --- | --- | --- | --- | --- | --- | --- | --- | --- | --- | --- | --- | --- | --- | --- | --- | --- | --- | --- |
|  | **Comunidad indígena misak (Colombia)** | | | | **Comunidad indígena saraguro (Ecuador)** | | | | **Comunidad indígena wayúu (Venezuela)** | | | | **Comunidades indígenas Latam**** | | | | **Comunidad no indígena (Colombia)** | | | | **Comunidad no indígena (Ecuador)** | | | | **Comunidad no indígena (México)** | | | |
| Variable | S | E | RV+ | ABC | S | E | RV+ | ABC | S | E | RV+ | ABC | S | E | RV+ | ABC | S | E | RV+ | ABC | S | E | RV+ | ABC | S | E | RV+ | ABC |
| Enfermedad reumática* | 63,33 | 80,26 | 3,20 | 0,71 (0,72-0,83) | 92,3 | 57,9 | 2,1 | 0,74 (0,69-0,80) | 100 | 11,1 | 1,13 | 78 (71-85) | 73,85 | 72,98 | 2,73 | 0,73 (0,69-0,77) | 70,83 | 35,0 | 1,09 | 0,53 (0,44-0,60) | 62,07 | 83,53 | 3,76 | 0,72 (0,66-0,78) | 51,7 | 80,1 | 2,6 | 0,65 |
| SDRA*** | 64,29 | 72,83 | 2,36 | 0,68 (0,67-0,77) | 92,8 | 38,2 | 1,5 | 0,65 (0,57-0,73) | 100 | 11,1 | 1,13 | 56 (49-62) | 72,73 | 61,03 | 1,86 | 0,66 (0,57-0,76) | 87,5 | 58,98 | 2,1 | 0,73 (0,64-0,82) | 100 | 42,93 | 1,75 | 0,71 (0,68-0,74) | 53,5 | 76,4 | 2,2 | 0,65(0,64-0,65) |
| AR | 100 | 69,23 | 1,26 | 0,84 (0,65-0,74) | 71,4 | 36,4 | 1,1 | 0,53 (0,35-0,72) |  |  |  |  | 90,91 | 60,78 | 2,31 | 0,75 (0,66-0,84) | 100 | 57,10 | 2,33 | 0,78 (0,75-0,81) | 100 | 43,59 | 1,77 | 0,71 (0,68-0,74) | 48,5 | 75,5 | 1,9 | 0,62 (0,61-0,62) |
| OA | 100 | 42,42 | 1,73 | 0,71 (0,66-0,76) |  |  |  |  | 100 | 14,6 | 1,17 | 54 (45-63) | 80,65 | 66,17 | 2,38 | 0,73 (0,68-0,77) | 65,52 | 58,87 | 1,59 | 0,62 (0,52-0,71) | 85,45 | 52,74 | 1,80 | 0,69 (0,62-0,75) | 51,8 | 78,0 | 2,3 | 0,64 (0,64-0,65) |
| OA de manos | 75 | 69,61 | 2,47 | 0,72 (0,65-0,74) | 100 | 39,3 | 1,6 | 0,69 (0,65-0,72) |  |  |  |  |  |  |  |  |  |  |  |  |  |  |  |  |  |  |  |  |
| OA de rodillas | 40 | 68,32 | 1,26 | 0,54 (0,65-0,75) | 97,4 | 43,8 | 1,7 | 0,70 (0,65-0,74) |  |  |  |  |  |  |  |  |  |  |  |  |  |  |  |  |  |  |  |  |
| Copcord: *Community Oriented Program for Control of Rheumatic Diseases*; AR: artritis reumatoide; OA: osteoartritis; SDRA: síndrome de dolor regional apendicular; ABC: área bajo la curva; E: especificidad; RV+: razón de verosimilitud positiva; S: sensibilidad.  *Enfermedad reumática, excluyendo los malestares musculoesqueléticos inespecíficos, los traumatismos y los no asociados a enfermedades reumáticas.  ** Venezuela: warao, chama, kariña, Argentina: qom, México: yucatec maya, mixtec, raramuri.  ***Síndrome regional apendicular. | | | | | | | | | | | | | | | | | | | | | | | | | | | | |
